# Supplementary material for: Effect of carbon-based carriers on HER performance of NiMo-based polyalloy catalysts
Source: Royal Society of Chemistry journal article supplement (doi:10.1039/d4ce01090f), 2024-12-10
Supplement: d4ce01090f1.pdf [file d4ce01090f1.pdf]

## Supplementary Material

### Effect of carbon-based carrier on HER performance of NiMo-based polyalloy catalysts

Guixin Zhao<sup>a,1</sup>, Sixuan Zhang<sup>a,1</sup>, Jinzhao Huang<sup>a\*</sup>, Zehui Liu<sup>a</sup>, Feng Jiao<sup>a</sup>, Ke  
Zhang<sup>a</sup>, Yu Zhang<sup>a</sup>, Xiaolong Deng<sup>b\*</sup>

<sup>a</sup> School of Physics and Technology, University of Jinan, Jinan 250022, Shandong  
Province, P R China

<sup>b</sup> School of Microelectronics and Data Science, Anhui University of Technology,  
Ma'anshan 243032, Anhui Province, P R China

Corresponding author:

E-mail addresses: ss\_huangjinzhao@ujn.edu.cn (J. Huang), dengxl84@ahut.edu.cn  
(X. Deng).

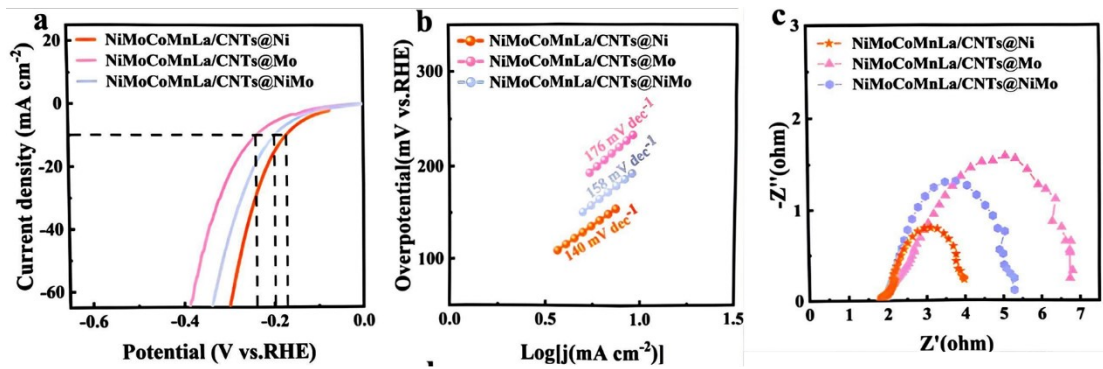

**Supplementary Figure 1.** (a) HER polarisation curves of NiMoCoMnLa/CNTs@Ni, NiMoCoMnLa/CNTs@Mo, NiMoCoMnLa/CNTs@NiMo. (b) Corresponding Tafel slopes; (c) AC impedance spectra;

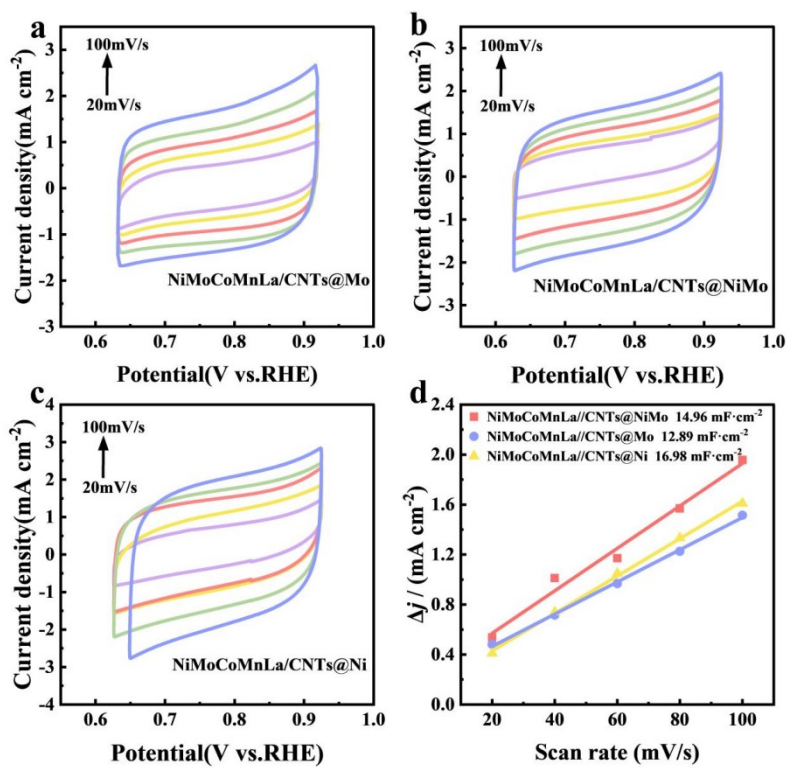

**Supplementary Figure 2.** (a) NiMoCoMnLa/CNTs@Mo, (b) NiMoCoMnLa/CNTs@NiMo, (c) NiMoCoMnLa/CNTs@Ni CV curves at scanning rates of 20, 40, 60, 80, and 100 mV/s; (d) current density versus scanning rate
